# Supplementary material for: Non-Invasive Evaluation of Patients Undergoing Percutaneous Coronary Intervention for Chronic Total Occlusion
Source: MDPI journal article supplement (doi:10.3390/jcm10204712), 2021-10-14
Supplement: s1 [file s1]

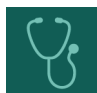

*Supplementary materials*

**Table S1.** Echocardiographic parameters of contractile function for segments with end-diastolic wall thickness <6mm at baseline and follow-up.

|         | Baseline   | Follow-up  | P value |
|---------|------------|------------|---------|
| LS, (%) | -7.43±3.25 | -7.95±3.06 | 0.67    |
| CS, (%) | -4.47±3.60 | -4.33±7.59 | 0.94    |
| WMS     | 2.75±1.06  | 2.83±0.94  | 0.77    |
